# Supplementary material for: PathVisio 3: An Extendable Pathway Analysis Toolbox
Source: PubMed Central journal article supplement (PMC4338111; doi:10.1371/journal.pcbi.1004085), 2015-02-23
Supplement: pcbi.1004085.s002.pdf [file pcbi.1004085.s002.pdf]

## S1 Table

*Manuscript:* PathVisio 3: An extendable pathway analysis toolbox

*Authors:* M. Kutmon, MP van Iersel, A Bohler, T Kelder, N Nunes, AR Pico, CT Evelo

|                    | Website                                                                                           | License                    | Type                          | Operating Systems          | Pathway Import Formats           | Pathway database, Knowledge Base                                            |
|--------------------|---------------------------------------------------------------------------------------------------|----------------------------|-------------------------------|----------------------------|----------------------------------|-----------------------------------------------------------------------------|
| <b>PathVisio 3</b> | <a href="http://www.pathvisio.org/">http://www.pathvisio.org/</a>                                 | free software (Apache 2.0) | desktop application or applet | Windows, Mac OSX, Linux    | GPML, BioPAX, SBGN, SBML, MIM    | Databases: WikiPathways, Reactome, NetPath, Wormbase, BioModels             |
| <b>Vanted</b>      | <a href="http://vanted.ipk-gatersleben.de/">http://vanted.ipk-gatersleben.de/</a>                 | free software (GPLv2)      | desktop application           | Windows, Mac OSX, Linux    | GML, KGML, SBML2, PAJEK          | KEGG, Biomodels                                                             |
| <b>ProMeTra</b>    | <a href="https://prometra.cebitec.uni-bielefeld.de">https://prometra.cebitec.uni-bielefeld.de</a> | no license specified       | web application               | Windows, Mac OSX, Linux    | SVG                              | Only user uploaded pathway maps some converted from KEGG or other resources |
| <b>KEGG Atlas</b>  | <a href="http://www.genome.jp/kegg/atlas.html">http://www.genome.jp/kegg/atlas.html</a>           | no license specified       | web application               | Windows, Mac OSX, Linux    | only KEGG pathways can be used   | KEGG Pathways                                                               |
| <b>Ingenuity</b>   | <a href="http://www.ingenuity.com/">http://www.ingenuity.com/</a>                                 | commercial software        | desktop application or applet | tested for Windows and Mac | SBML, BioPAX, SIF, XGMML, PSI-MI | Ingenuity knowledge base                                                    |

**Table S1A. Pathway tool comparison table.**

|                    | <b>Pathway creation</b>                                                                                             | <b>File export</b>                                                     | <b>Experimental Data</b>                                   | <b>Data Type</b>                 | <b>Identifiers Supported</b>                                                                  |
|--------------------|---------------------------------------------------------------------------------------------------------------------|------------------------------------------------------------------------|------------------------------------------------------------|----------------------------------|-----------------------------------------------------------------------------------------------|
| <b>PathVisio 3</b> | Intuitive, simple creation of fully annotated pathway diagrams<br>Support of different drawing standards: SBGN, MIM | GPML, BioPAX, SBGN, SBML, MIM, PNG, SVG, TIFF, PDF, Gene list, Eu.Gene | Transcriptomics, proteomics, metabolomics, fluxomics       | numerical and non-numerical data | advanced identifier mapping framework integrated (all major identifier systems are supported) |
| <b>Vanted</b>      | Graph-Editor - flexible tool to change the shape, color, size and other attributes of nodes and edges               | GML, JPEG, PNG, SVG, PDF                                               | Transcriptomics, proteomics, metabolomics                  | numerical data                   | Identifiers used in the networks (KEGG Compound and EC numbers for KEGG networks)             |
| <b>ProMeTra</b>    | Pathway creation as SVG in Inkscape                                                                                 | SVG                                                                    | Transcriptomics, proteomics, metabolomics                  | numerical data                   | KEGG compound, locus tags, gene names                                                         |
| <b>KEGG Atlas</b>  | -                                                                                                                   | PNG                                                                    | Transcriptomics, proteomics, metabolomics                  | defining color directly          | KEGG compound, EC number                                                                      |
| <b>Ingenuity</b>   | Creating new and extending existing pathways is possible                                                            | JPEG, GIF, PNG, HTML, SVG, EPS, EMF, BMP, PDF, TIFF                    | Transcriptomics, proteomics, metabolomics, microRNAs, SNPs | numeric data                     | most major identifier systems are supported                                                   |

**Table S1B. Pathway tool comparison table.**
