# Supplementary material for: PathVisio 3: An Extendable Pathway Analysis Toolbox
Source: PubMed Central journal article supplement (PMC4338111; doi:10.1371/journal.pcbi.1004085), 2015-02-23
Supplement: pcbi.1004085.s004.pdf [file pcbi.1004085.s004.pdf]

## Instructions for building and running PathVisio from source

1. Retrieve the latest version of the PathVisio source code from the SVN repository:

PathVisio 3.1.3

[http://svn.bigcat.unimaas.nl/pathvisio/branches/milestone\\_36.x/](http://svn.bigcat.unimaas.nl/pathvisio/branches/milestone_36.x/)

2. Run ant (<http://ant.apache.org/>) in the pathvisio main directory.

This takes a few seconds to build all the individual modules.

Requirement: Java 1.6 or higher

3. Start PathVisio by either running pathvisio.sh (on Linux and Mac OS) or pathvisio.bat (on Windows)
- 

## Instructions for running PathVisio using binary installation

1. Download the binaries for PathVisio 3.1.3:

[http://pathvisio.org/data/releases/3.1.3/pathvisio\\_bin-3.1.3-r3968.zip](http://pathvisio.org/data/releases/3.1.3/pathvisio_bin-3.1.3-r3968.zip)

2. Unzip the zip file

3. Start PathVisio by either running pathvisio.sh (on Linux and Mac OS) or pathvisio.bat (on Windows)
